# Supplementary material
Source: PubMed Central journal article supplement (PMC6125178)
Supplement: NIHMS1500075-supplement-1.pdf [file NIHMS1500075-supplement-1.pdf]

# Supplementary Figure 1

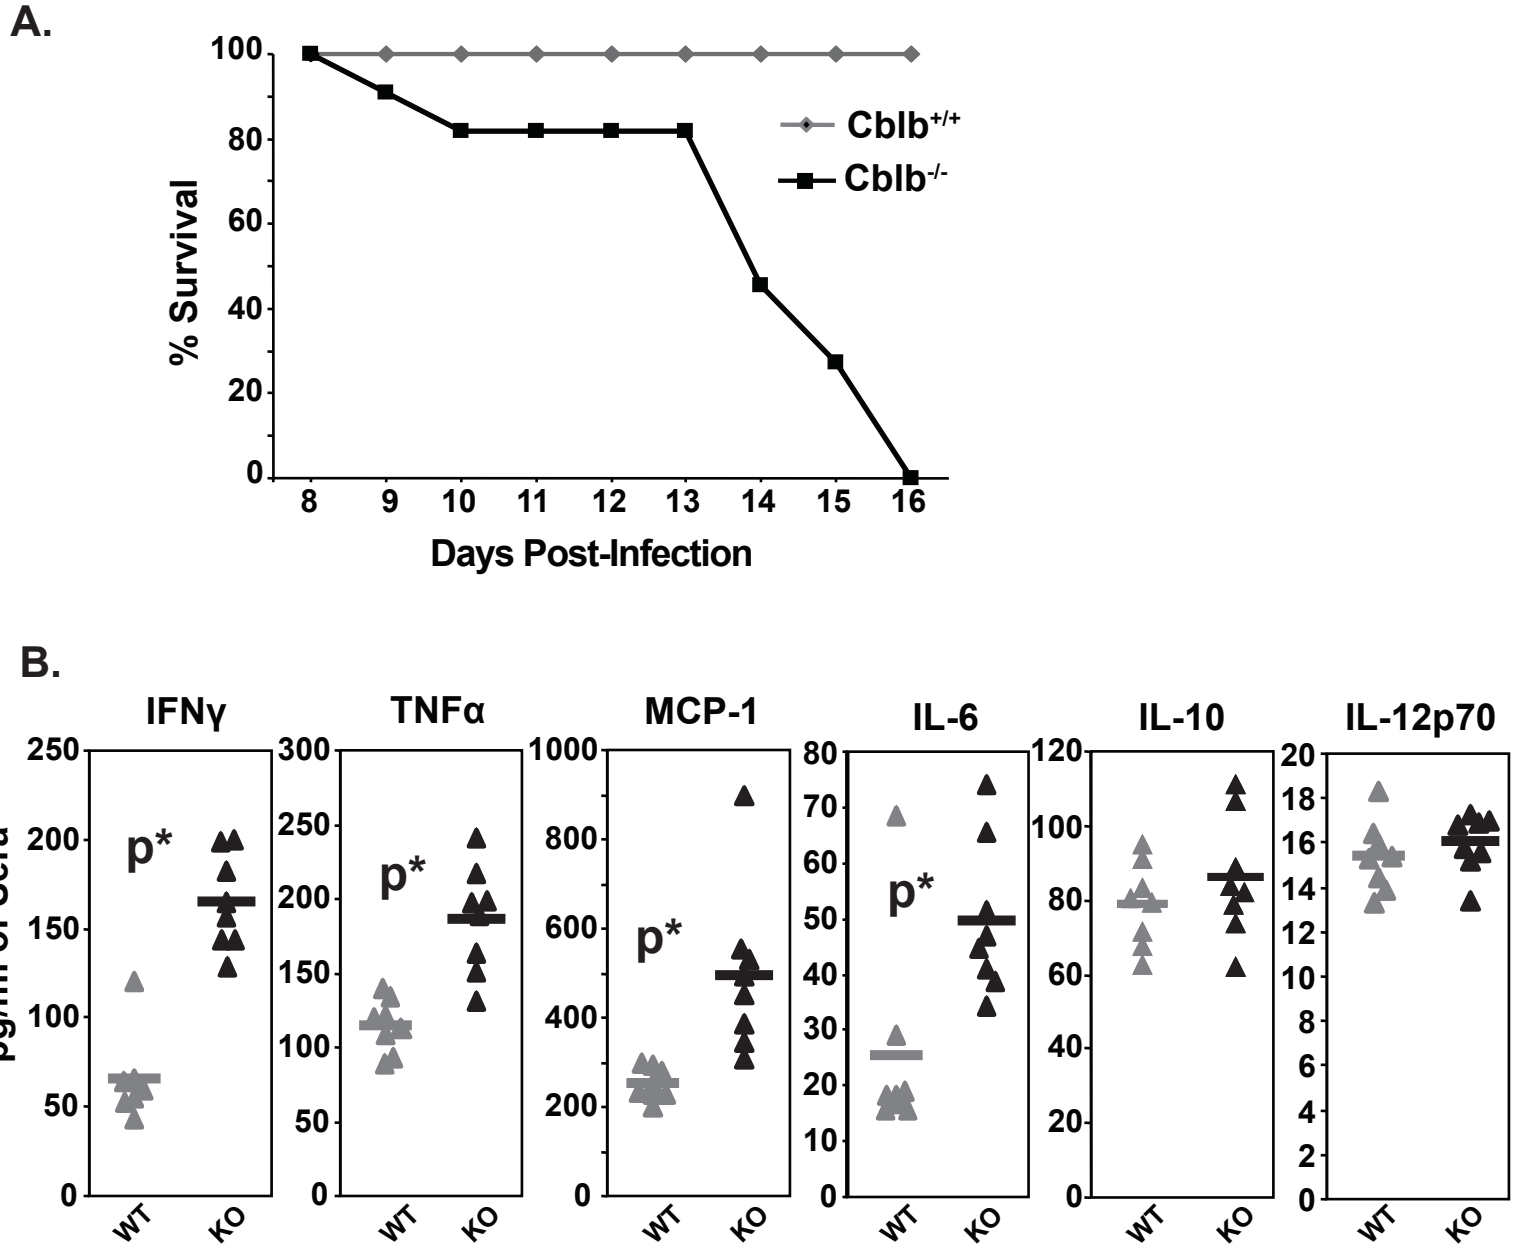

Supplementary Figure 1. Cblb deficiency leads to immunopathology during chronic viral infection.

Naïve Cblb<sup>+/+</sup> and Cblb<sup>-/-</sup> mice were infected with LCMV Clone 13. Mice were monitored for their survival (A). Serum concentration (pg/ml) of cytokines measured by BD Biosciences Cytokine Bead Array (B). N=8 mice/group. \*p $\leq$ 0.05.

## Supplementary Figure 2

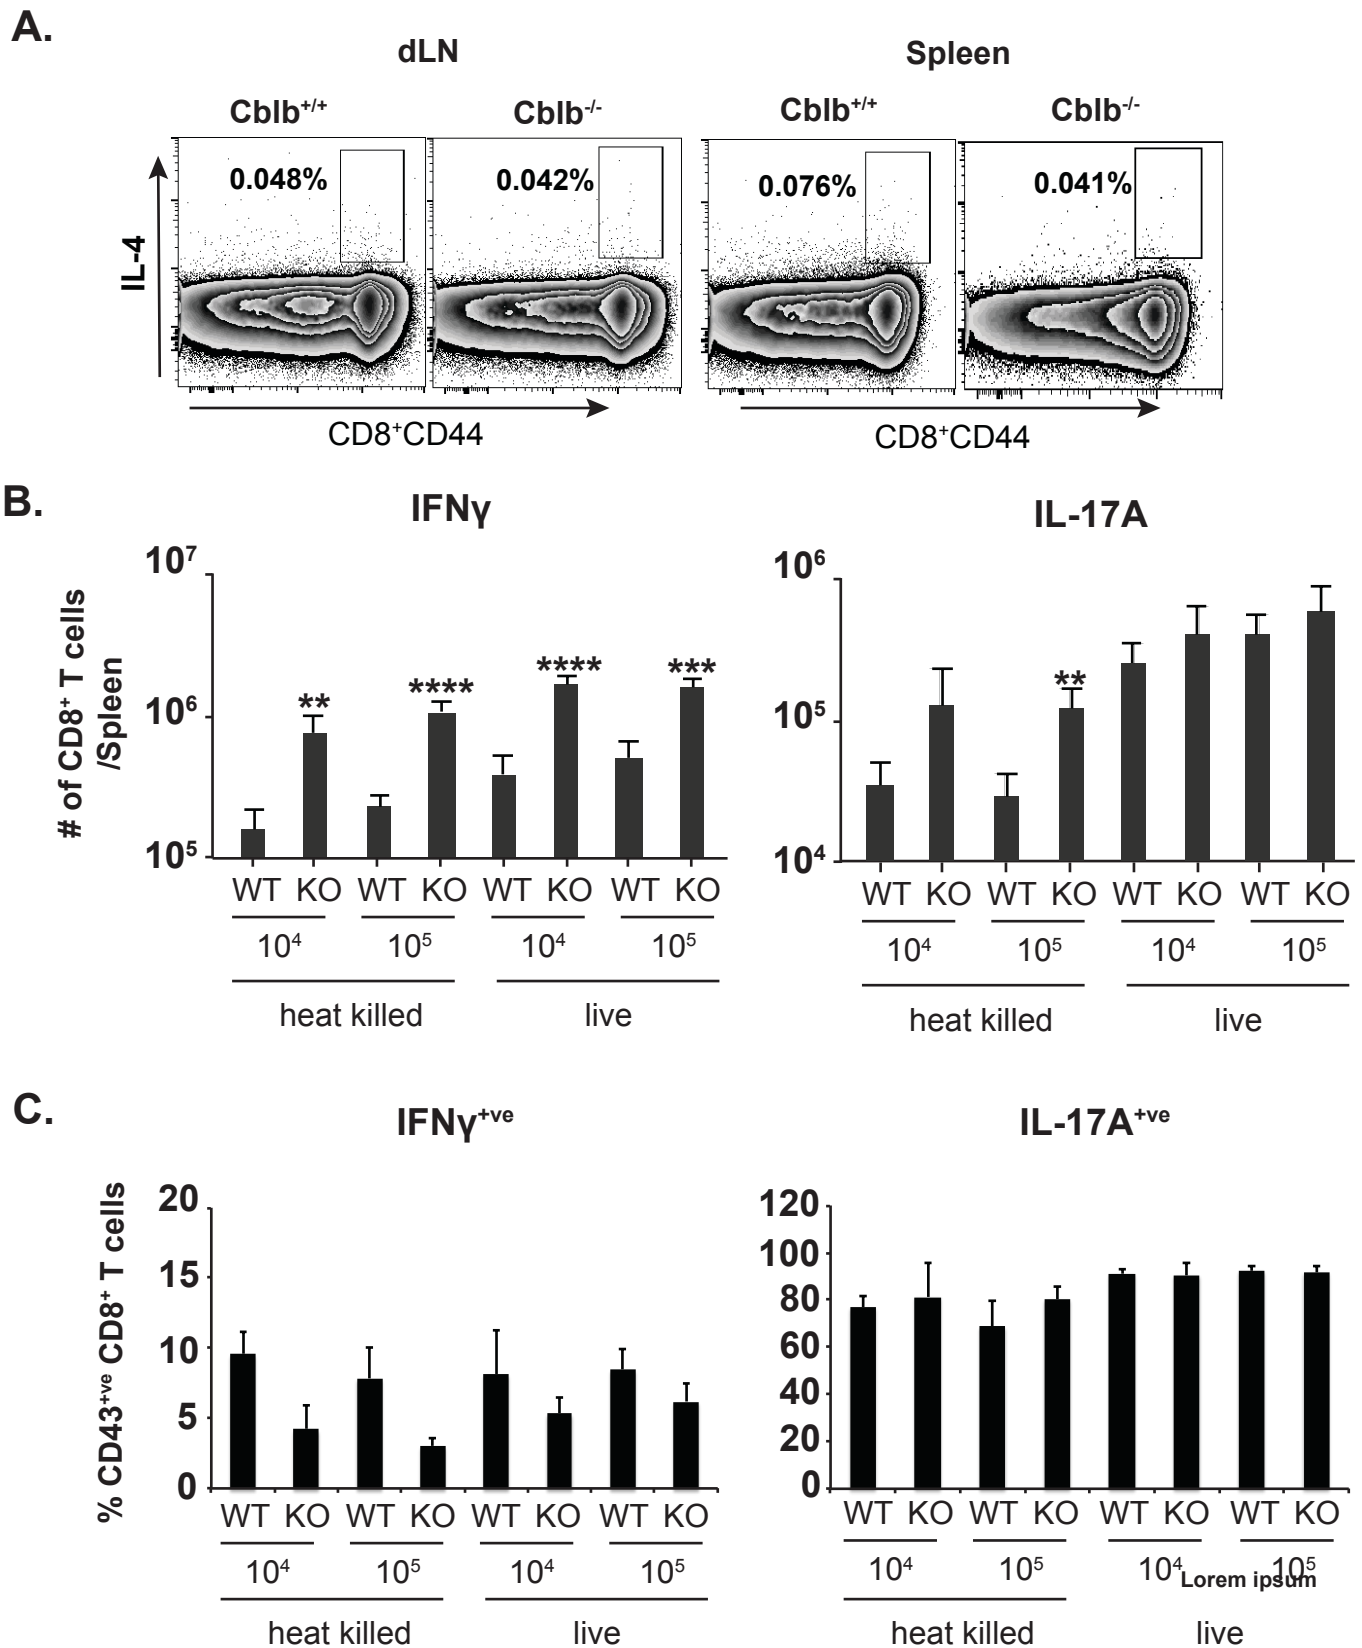

**Supplementary Figure 2. Antifungal CD8<sup>+</sup> T cell responses.** Naïve Cblb<sup>+/+</sup> and Cblb<sup>-/-</sup> were vaccinated with either live or heat killed strain #55 yeast. On day 25, dLNs and Spleens were harvested to analyze percent IL-4 producing cells among CD8<sup>+</sup> T cells by flow cytometry (A). On day 18, spleens were harvested to analyze cytokine-producing CD8<sup>+</sup> T cells by flow cytometry (B) and percent CD43<sup>+</sup> cytokine-producing CD8<sup>+</sup> T cells (C). Values are mean  $\pm$  SD. N=4-5 mice/group. \*p $\leq$ 0.05.

# Supplementary Figure 3

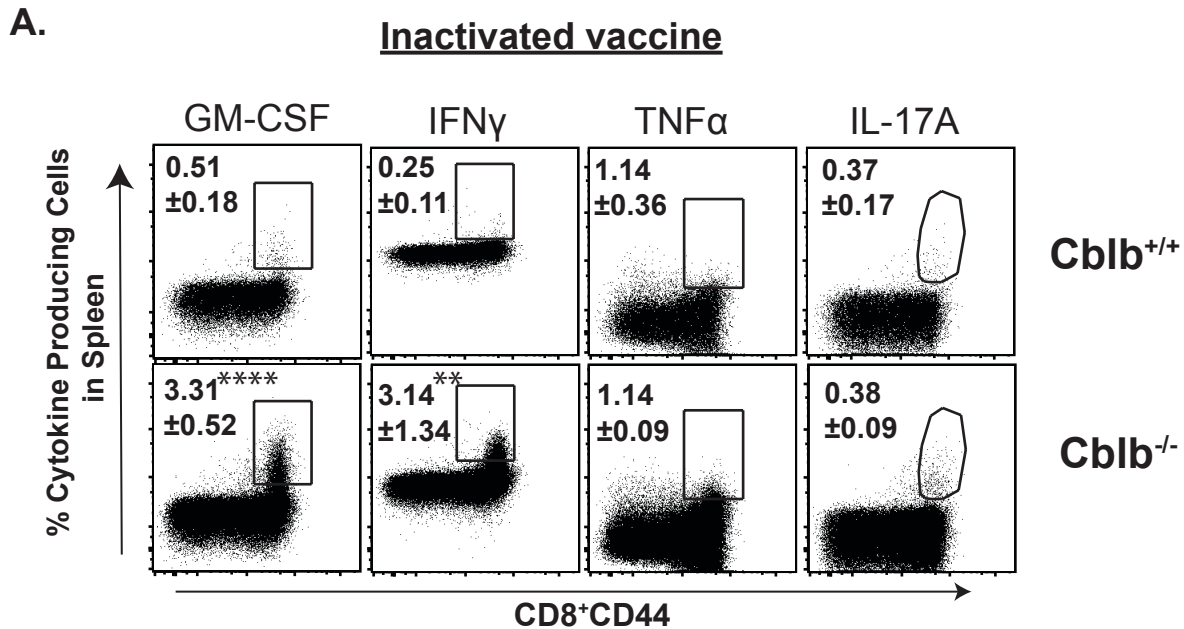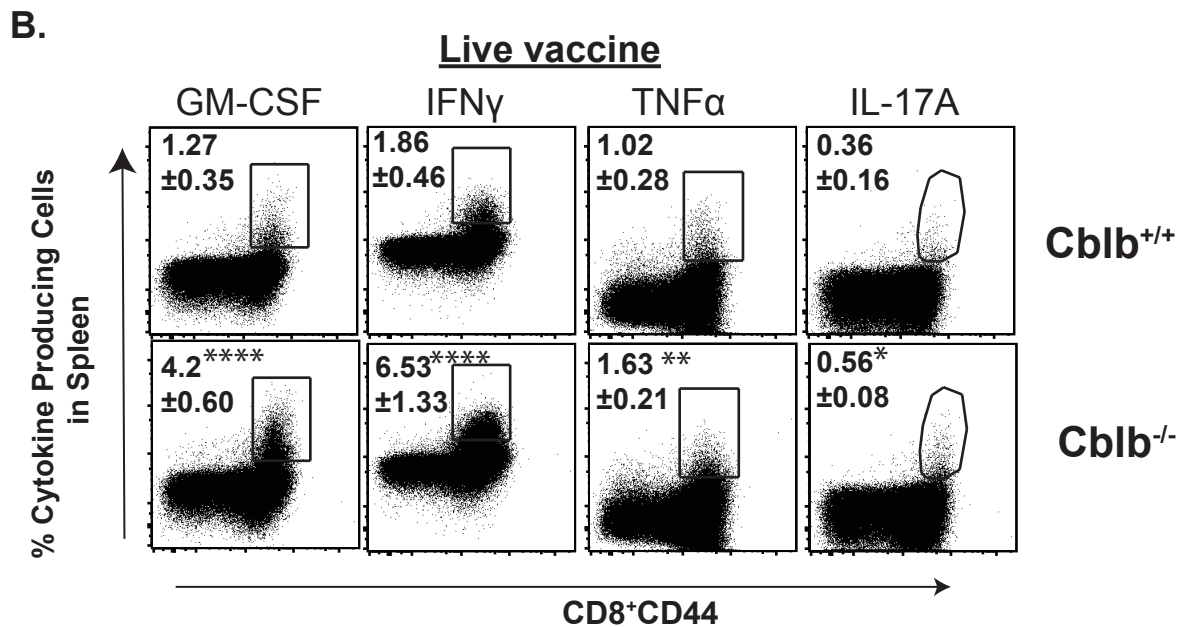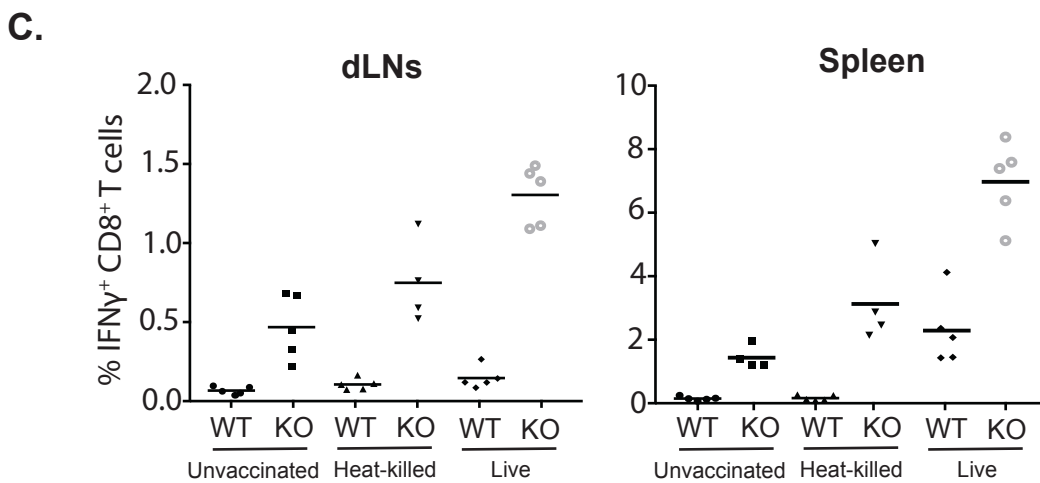

**Supplementary Figure 3. Attributes of antifungal CD8<sup>+</sup> T cell responses.** Naïve Cblb<sup>+/+</sup> and Cblb<sup>-/-</sup> mice were vaccinated and cells were analyzed as described in Figure 5. Percent cytokine producing CD8<sup>+</sup> T cells in spleens following vaccination with inactivated yeast (A), live-yeast (B) or both (C). Values are mean  $\pm$  SD. N=4 mice/group. \*p $\leq$  0.05.

## Supplementary Figure 4

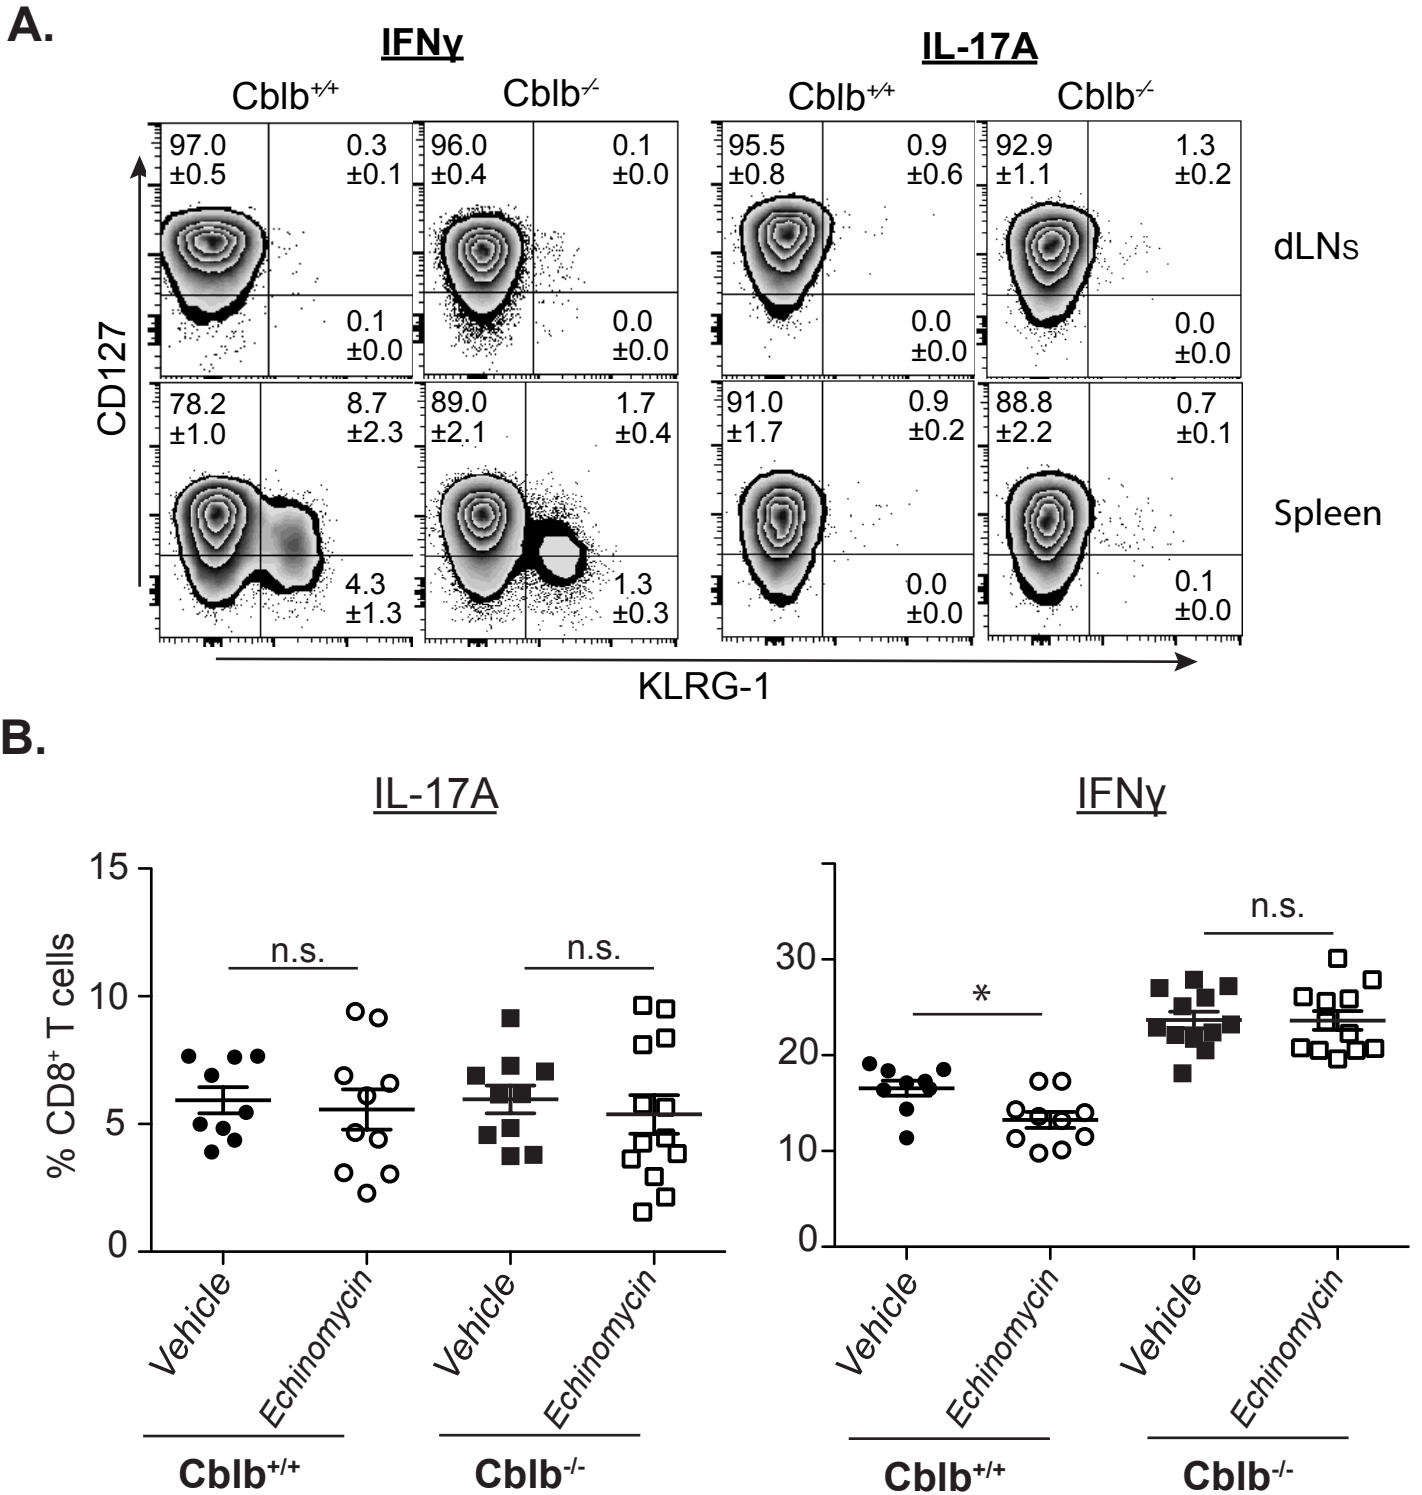

**Supplementary Figure 4. CD127 and KLRG-1 expression on and role of HIF-1 $\alpha$  in antifungal CD8<sup>+</sup>**

**T cells.** Naïve Cblb<sup>+/+</sup> and Cblb<sup>-/-</sup> mice were vaccinated with attenuated #55 strain. (A) On day 25, CD8<sup>+</sup> T cells were analyzed by flow cytometry. Data shows percent KLRG-1 and CD127 expression on cytokine-producing CD8<sup>+</sup> T cells in dLNs and spleens. N=4-5 mice/group. Data is representative of three independent experiments. (B) Following vaccination, cohorts of mice were received either vehicle or Echinomycin (3  $\mu$ g/mouse) every other day starting from day 4 post-vaccination. On day 14-16, spleens were harvested to analyze cytokine-producing CD8<sup>+</sup> T cells by flow cytometry. Scatter diagrams show frequency of cytokine-producing cells among CD8<sup>+</sup> T cells. Each individual marker represents the value from a single mouse. Data is pooled from two independent experiments. Values are mean  $\pm$  SD. \*p $\leq$ 0.05.
